# Supplementary material for: Use of a 3D Inkjet-Printed Model to Access Dust Particle Toxicology in the Human Alveolar Barrier
Source: Research Square preprint supplement (doi:10.21203/rs.3.rs-1305886/v1), 2022-02-03
Supplement: Supplementary file 1 [file adfc4b686d161c0b6a689064.docx]

**Supporting data**

Use of a 3D inkjet-printed model to access dust particle toxicology in the human alveolar barrier

Dayoon Kang1, Hyomin Lee2, and Sungjune Jung1,2,3,*

**Table S1. qPCR primer list**

| **Target gene** | **Primer sequence (5’ 🡪 3’)** |
| --- | --- |
| IL-1β | F: CCT GTC CTG CGT GTT GAA AGA |
| R: GGG AAC TGG GCA GAC TCA AA |
| TNFα | F: GTA GCC CAT GTT GTA GCA AA |
| R: AAG AGG ACC TGG GAG TAG AT |
| MMP1 | F: GAA AGA AGA CAA AGG CAA GT |
| R: TCA CTT TCA GCC CAA AGA AT |
| MMP9 | F: CTC TGG AGG TTC GAC GTG |
| R: GTC CAC CTG GTT CAA CTC AC |
| ITGA1 | F: CTC CTC ACT GTT GTT CTA CG |
| R: AGA ACC AAT AAG CAC CCA TT |
| ITGB1 | F: CCA TTG GAG ATG AGG TTC AA |
| R: CTC TAC TTC CTC CGT AAA GC |
| SP-A | F: TTG GAG CCT GAA AAG AAG GA |
| R: GGC TTG GAG CTC CTC ATC TA |
| SP-B | F: AGG TGG ACT TCC AGC TTT TGA T |
| R: CAG CAC TTT AAA GGA CGG TGT C |
| GAPDH | F: CTC CTC TGA CTT CAA CAG CGA CA |
| R: GAG GGT CTC TCT CTT CCT CTT GT |
